# Supplementary material
Source: publisher figshare collection journal article supplement (https://acs.figshare.com/ndownloader/files/9981619)
Supplement: Supplementary file 1 [file 9981619]

## Supporting Information

### Asymmetric Nanochannel-Ionchannel Hybrid for Ultrasensitive and Label-free Detection of Copper Ions in Blood

Xiao-Ping Zhao,<sup>1,2</sup> Shan-Shan Wang,<sup>1</sup> Muhammad Rizwan Younis,<sup>2</sup> Xing-Hua Xia,<sup>\*2</sup>  
Chen Wang<sup>\*1</sup>

<sup>1</sup>Key Laboratory of Biomedical Functional Materials, School of Science, State Key Laboratory of Natural Medicines, China Pharmaceutical University, Nanjing 210009, China

<sup>2</sup>State Key Laboratory of Analytical Chemistry for Life Science, School of Chemistry and Chemical Engineering, Nanjing University, Nanjing 210093, China

\*To whom correspondence should be addressed. E-mail: [xhxia@nju.edu.cn](mailto:xhxia@nju.edu.cn);  
[wangchen@cpu.edu.cn](mailto:wangchen@cpu.edu.cn)

**Scheme S1.** The chemical structural formula of PGA.

**Figure S1.** ICR ratio for different ionic transport process.

**Figure S2.** Cu<sup>2+</sup>-PGA recognition kinetics.

**Figure S3.** *I-V* curve of PGA-free PAA with and without Cu<sup>2+</sup> (10 μM).

**Figure S4.** *I-V* curve of PGA- modified symmetric PAA membranes in the present of different Cu<sup>2+</sup> (the amplify inset).

**Figure S5.** The *I-V* profiles of the PGA modified nanochannel-ionchannel hybrid for detection of Cu<sup>2+</sup> using different methods.

**Figure S6.** Cu<sup>2+</sup>-PGA recognition kinetics for different systems.

**Figure S7.** The current values versus of Cu<sup>2+</sup> concentrations.

**Figure S8.** The *I-V* profiles of different concentrations of Cu<sup>2+</sup> in tap water samples.

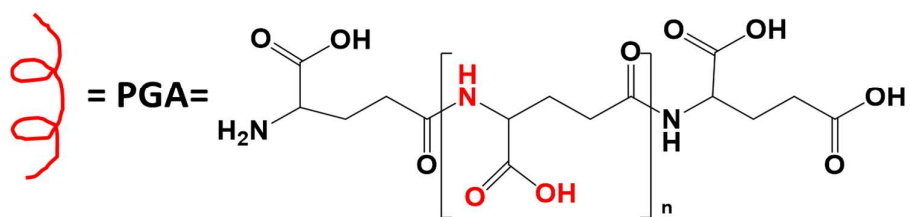

**Scheme S1.** The chemical structural formula of PGA.

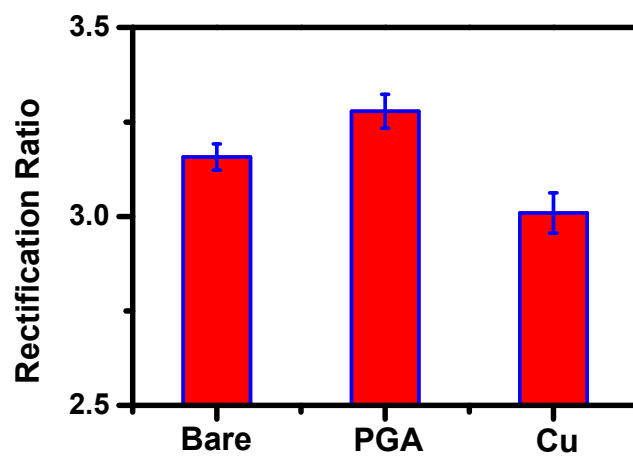

**Figure S1.** ICR ratio for different processes.

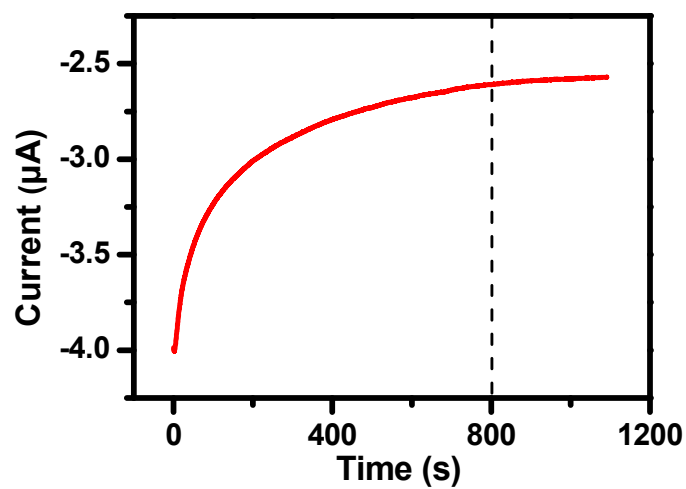

**Figure S2.**  $\text{Cu}^{2+}$ -PGA recognition kinetics. The dashed line means the time needed for PGA- $\text{Cu}^{2+}$  recognition equilibrium. The  $\text{Cu}^{2+}$  concentration is  $3.37 \times 10^{-10} \mu\text{M}$ .

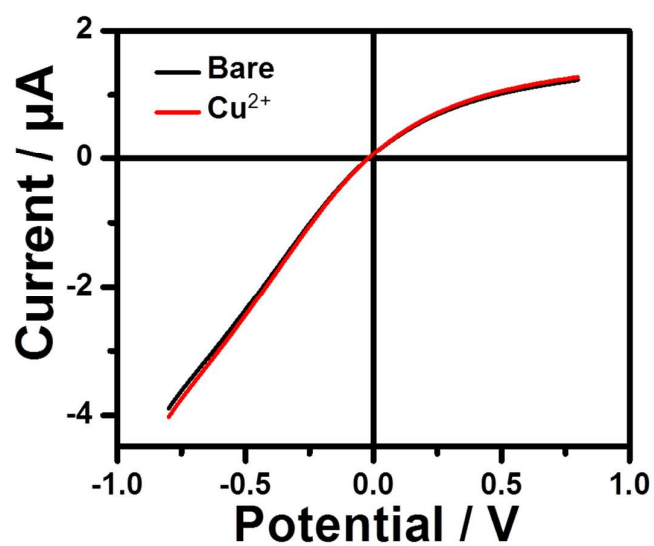

**Figure S3.**  $I$ - $V$  curve of PGA-free PAA with and without  $\text{Cu}^{2+}$  ( $10 \mu\text{M}$ ).

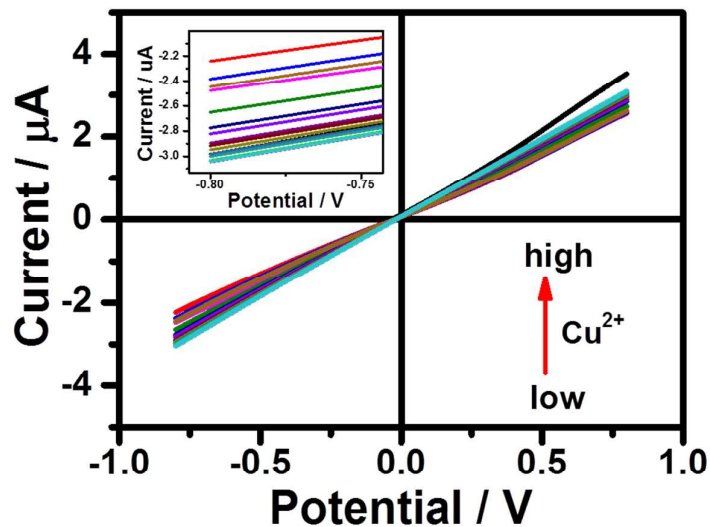

**Figure S4.** *I-V* curve of PGA- modified symmetric PAA membranes in the present of different  $\text{Cu}^{2+}$  (the amplify inset).

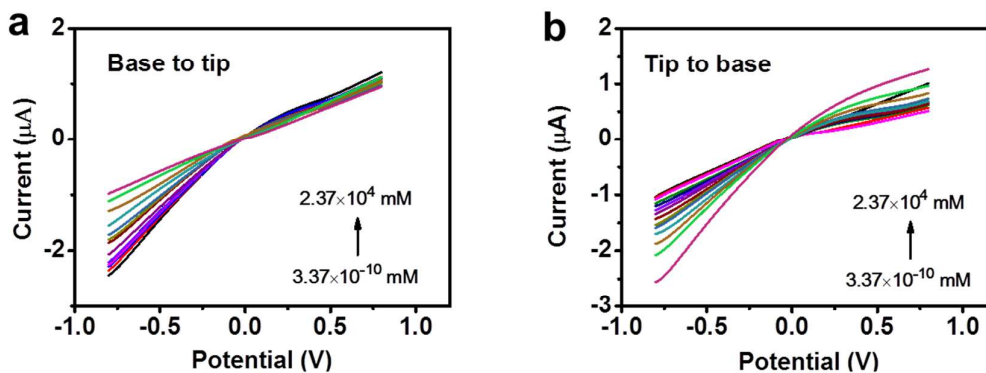

**Figure S5.** The *I-V* profiles of the PGA modified nanochannel-ionchannel hybrid for detection of  $\text{Cu}^{2+}$  using different methods. (a)  $\text{Cu}^{2+}$  ions were added in the nanochannel side of PAA membrane (b)  $\text{Cu}^{2+}$  ions were added in the ionchannel side of PAA membrane.

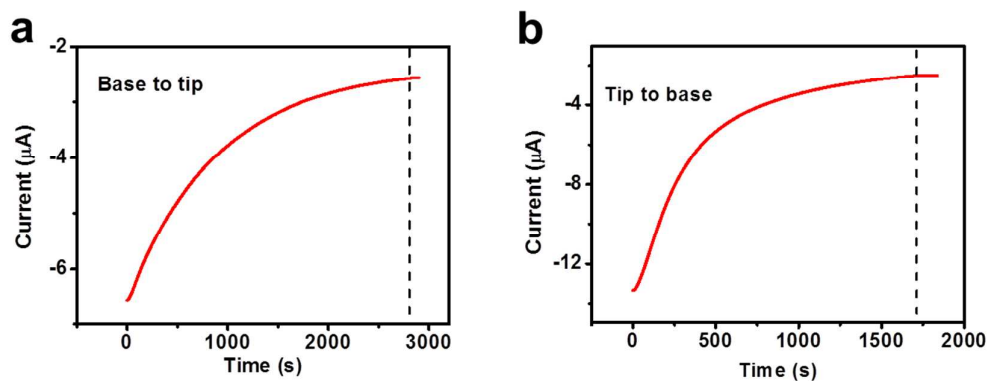

**Figure S6.**  $\text{Cu}^{2+}$ -PGA recognition kinetics for different systems. (a)  $\text{Cu}^{2+}$  ions were added in the nanochannel side of PAA membrane (b)  $\text{Cu}^{2+}$  ions were added in the ionchannel side of PAA membrane. The dashed line means the time needed for PGA- $\text{Cu}^{2+}$  recognition equilibrium. The  $\text{Cu}^{2+}$  concentration is  $3.37 \times 10^{-10} \mu\text{M}$ .

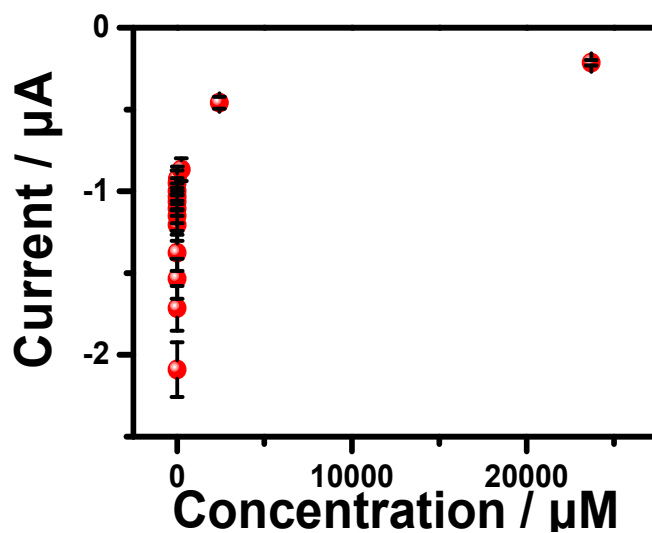

**Figure S7.** The current values versus of  $\text{Cu}^{2+}$  concentrations.

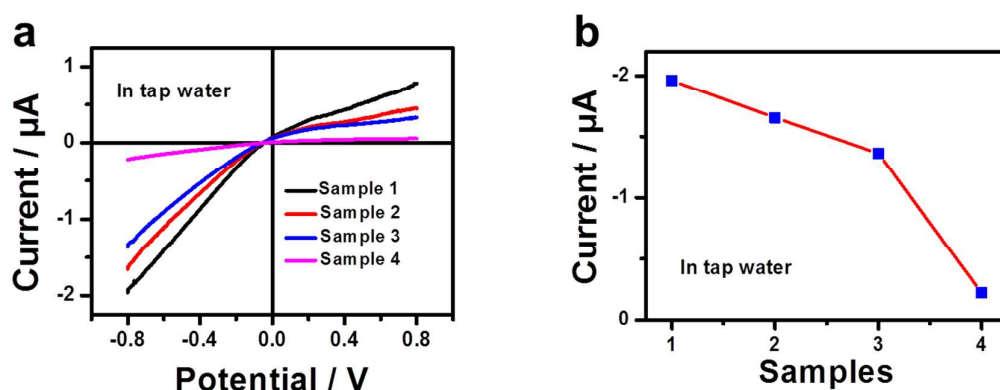

**Figure S8.** (a) The  $I$ - $V$  profiles of different concentrations of  $\text{Cu}^{2+}$  in tap water samples. (Sample 1: no additional  $\text{Cu}^{2+}$  in tap water; Sample 2: added  $5 \times 10^{-7} \mu\text{M}$  in tap water; Sample 3: added  $5 \times 10^{-3} \mu\text{M}$  in tap water; Sample 4: added  $5 \times 10^5 \mu\text{M}$  in tap water). (b) The ionic current at -0.8 V versus different tap water samples.

**Table S1.** Results of the detection of  $\text{Cu}^{2+}$  in real tap water samples.

| Sample   | Added $\text{Cu}^{2+}$ ( $\mu\text{M}$ ) | Measured $\text{Cu}^{2+}$ ( $\mu\text{M}$ ) | Recovery (%) |
|----------|------------------------------------------|---------------------------------------------|--------------|
| Sample 1 | 0                                        | $2.27 \times 10^{-8}$                       | /            |
| Sample 2 | $5 \times 10^{-7}$                       | $4.99 \times 10^{-7}$                       | 99.9         |
| Sample 3 | $5 \times 10^{-3}$                       | $4.67 \times 10^{-3}$                       | 93.4         |
| Sample 4 | $5 \times 10^5$                          | $5.63 \times 10^5$                          | 112.6        |
